# Supplementary material for: Sp1 Mediates the Constitutive Expression and Repression of the PDSS2 Gene in Lung Cancer Cells
Source: PubMed Central journal article supplement (PMC6947312; doi:10.3390/genes10120977), 2019-11-27
Supplement: genes-10-00977-s001.pdf [file genes-10-00977-s001.pdf]

**Supplementary Materials:**

**Table S1 The primer sequences for *PDSS2* promoter reporter construction**

| Constructs         | Primer sequences                          | Restriction site  |
|--------------------|-------------------------------------------|-------------------|
| P2031(-1768/+1263) | F:5'- GGGGTACCAGGGCATAGACTGTGTTTGATAC -3' | <i>Kpn</i> I site |
|                    | R:5'- CTAGGCTAGCTGGGGGTATCCAGAAGTGCCG -3' | <i>Nhe</i> I site |
| P764(-501/+263)    | F:5'- GGCCCTGAGGACACGAGGGC -3'            | <i>Kpn</i> I site |
|                    | R:5'- GGTACCTATCGATAGAGAAATGTTCTGGC -3'   | <i>Nhe</i> I site |
| P464(-201/+263)    | F:5'- GATACCGTGTGCAGAGGGACCA -3'          | <i>Kpn</i> I site |
|                    | R:5'- GGTACCTATCGATAGAGAAATGTTCTGGC -3'   | <i>Nhe</i> I site |
| P202(-201/+1)      | F:5'- GCTAGCCCGGGCTCGAGATCTGCGATCT-3'     | <i>Kpn</i> I site |
|                    | R:5'- TGCCGTAAAGACAGAGGCGGGTTGTTAAG -3'   | <i>Nhe</i> I site |
| PDSS2-P202M1       | F:5'- ACAACTGATCCCTGTCACTGACGACC -3'      | <i>Kpn</i> I site |
|                    | R:5'- CTACGGCGAGTGGTCCCTCTGCAC -3'        | <i>Nhe</i> I site |
| PDSS2-P202M2       | F:5'- AATTTTTGGGAGGAGCTGAACCTCCC -3'      | <i>Kpn</i> I site |
|                    | R:5'- CGCTCTGGGCCAGCAAAGGTCGTCAG -3'      | <i>Nhe</i> I site |
| PDSS2-P202M3       | F:5'- TAGAATCTGCGGGGCGTTCGCGGT -3'        | <i>Kpn</i> I site |
|                    | R:5'- TGCTTTGGAGGTGAACCCGGGTTGGG -3'      | <i>Nhe</i> I site |
| PDSS2-P202M4       | F:5'- TTCTCGGGTACGCCGTAAAGTAGAG -3'       | <i>Kpn</i> I site |
|                    | R:5'- CTAACCCGACAGGGGCGGTGCTTTG -3'       | <i>Nhe</i> I site |

**Table S2 The primer sequences for *RT-PCR* and *CHIP***

| Gene                   | Primer sequences                 |
|------------------------|----------------------------------|
| GAPDH( <i>RT-PCR</i> ) | F:5'- ACCTGACCTGCCGTCTAGAA -3'   |
|                        | R:5'- TCCACCACCCTGTTGCTGTA -3'   |
| Sp1( <i>RT-PCR</i> )   | F:5'- GTGGAGGCAACATCATTGCTG -3'  |
|                        | R:5'- GCCACTGGTACATTGGTCACAT -3' |
| PDSS2( <i>RT-PCR</i> ) | F:5'- TCTAGCAAATGCCTGCAATG -3'   |
|                        | R:5'- TCTGCTCCTTCCAAGTCGAT -3'   |
| PDSS2( <i>CHIP</i> )   | F:5'- CGCCCACAACCTGACCCTGTCA -3' |
|                        | R:5'- GAATGCGGCCTGCCGTAAAGAC -3' |
